# Supplementary material for: Comparison of Vertical and Inverted-T Mammaplasties Using Photographic Measurements
Source: PubMed Central journal article supplement — Plast Reconstr Surg Glob Open. 2014 Jan 6;1(9):e89. doi: 10.1097/GOX.0000000000000034 (PMC4174109; doi:10.1097/gox.0000000000000034), 2014-01-06
Supplement: gox-1-e89-s001.pdf [file gox-1-e89-s001.pdf]

# Mastopexy - Vertical

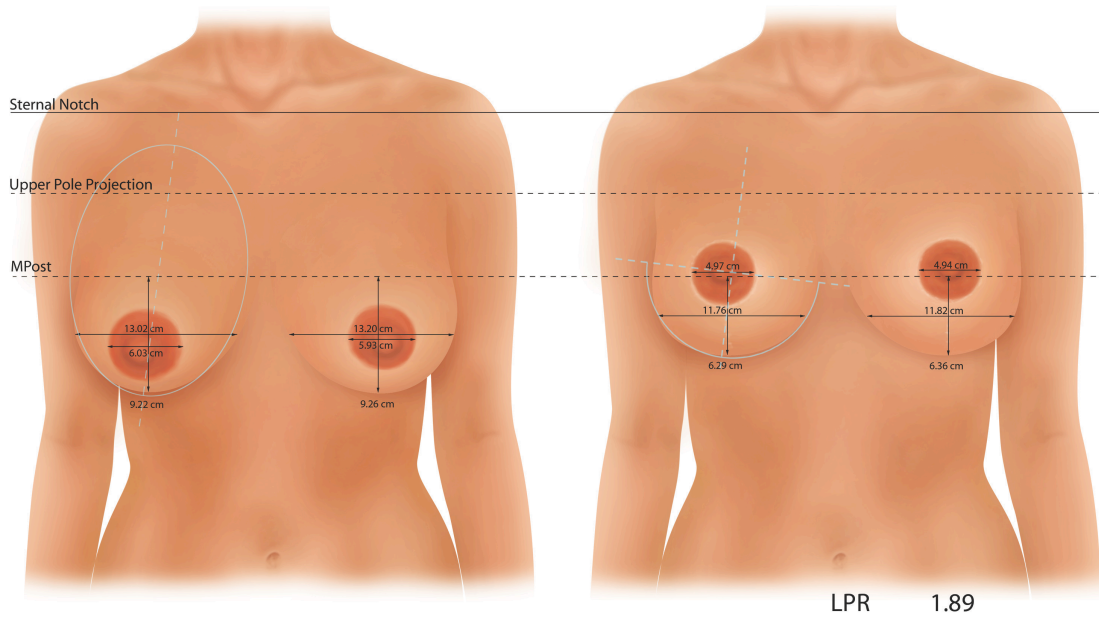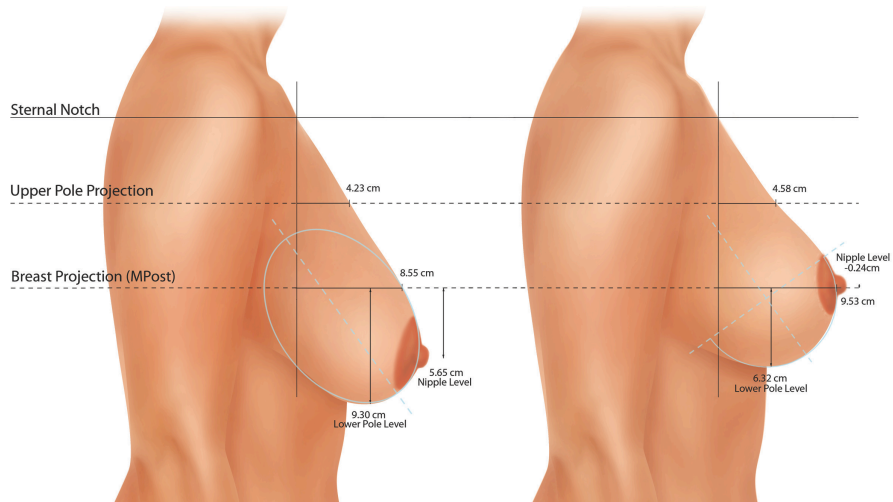

Supplemental File 1.

(Left) Breast shape before and (right) after vertical mastopexy. The elliptical profile of the lower pole is tightened in the direction of the breast axis, converting an ellipse to a semicircle on both frontal and lateral views. Breast projection and upper pole projection increase. Illustrations are based on actual mean breast measurements. MPost, maximum postoperative breast projection; LPR, lower pole ratio; BPR, breast parenchymal ratio; BME, breast mound elevation.

Area 0.82  
 Convexity 0.48  
 BPR 1.31  
 BME 5.53

# Mastopexy - Inverted-T

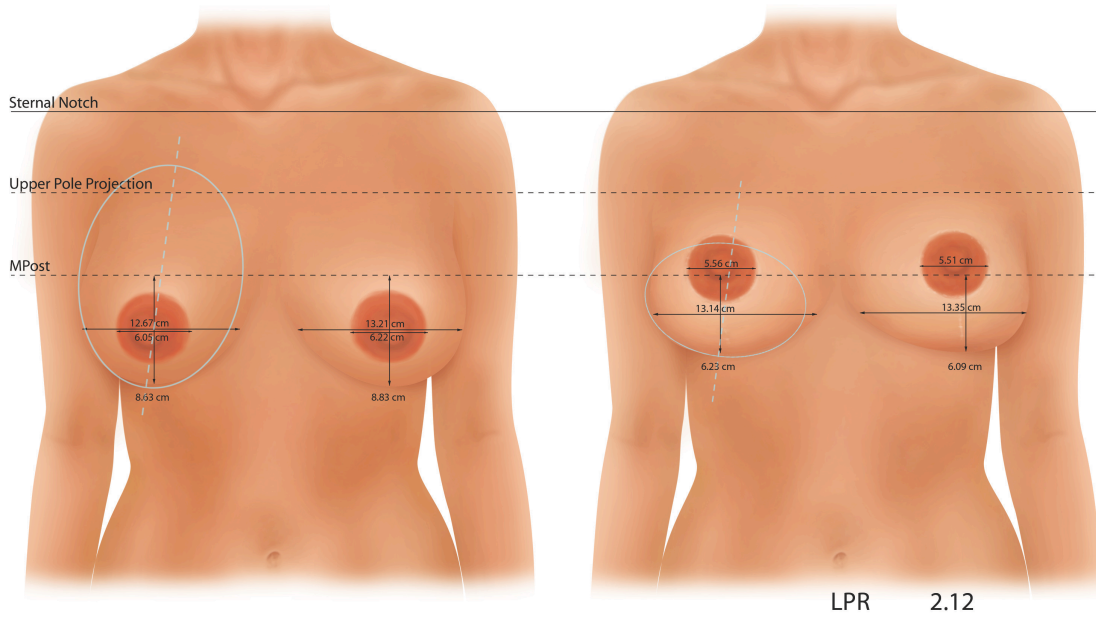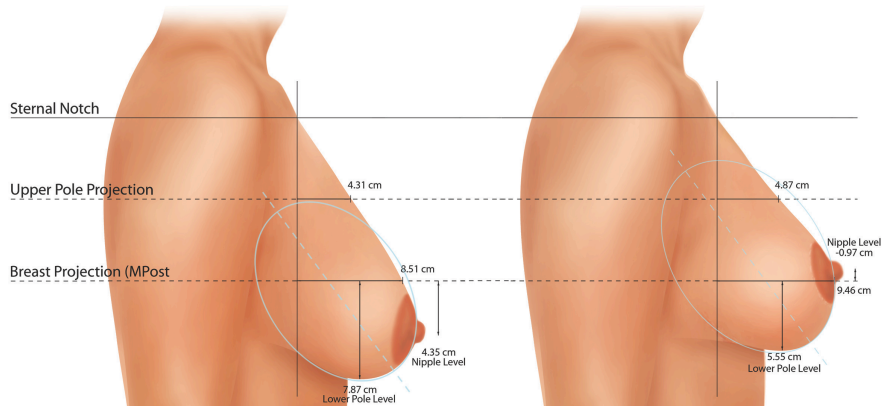

Supplemental File 2.

(Left) Breast shape before and (right) after inverted-T mastopexy. (Above) After surgery, the lower pole changes to a horizontal elliptical profile on the frontal view with a boxy mean lower pole ratio of 2.12. (Below) The profile of the lower pole remains elliptical on the lateral view. Illustrations are based on actual mean breast measurements. MPost, maximum postoperative breast projection; LPR, lower pole ratio; BPR, breast parenchymal ratio; BME, breast mound elevation.

Area 0.94  
Convexity 0.51  
BPR 1.69  
BME 4.23

# Augmentation/Mastopexy - Vertical

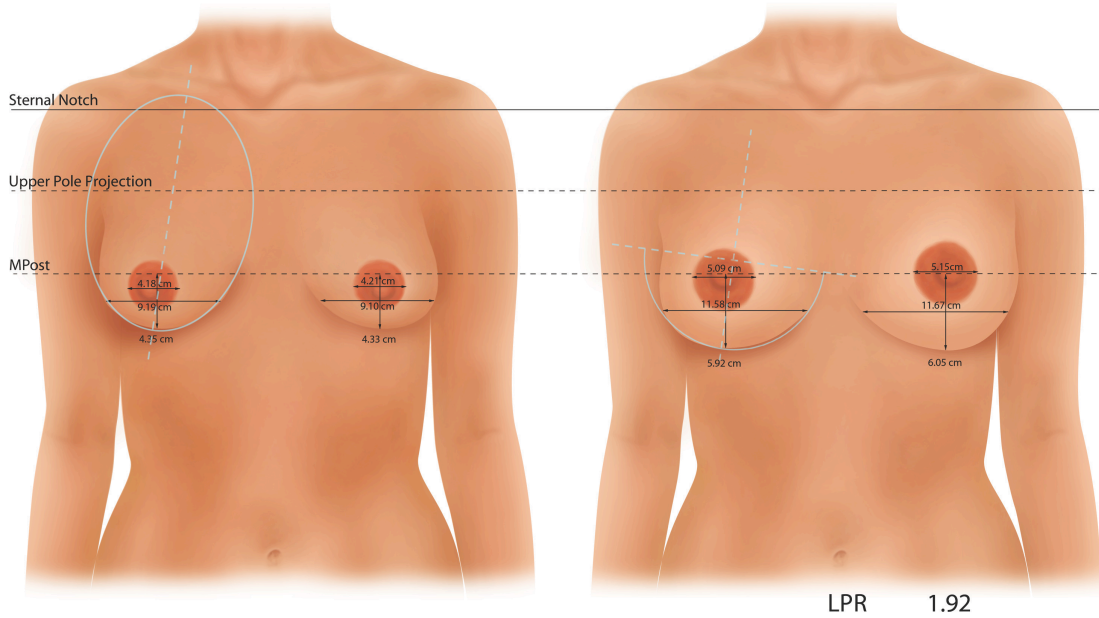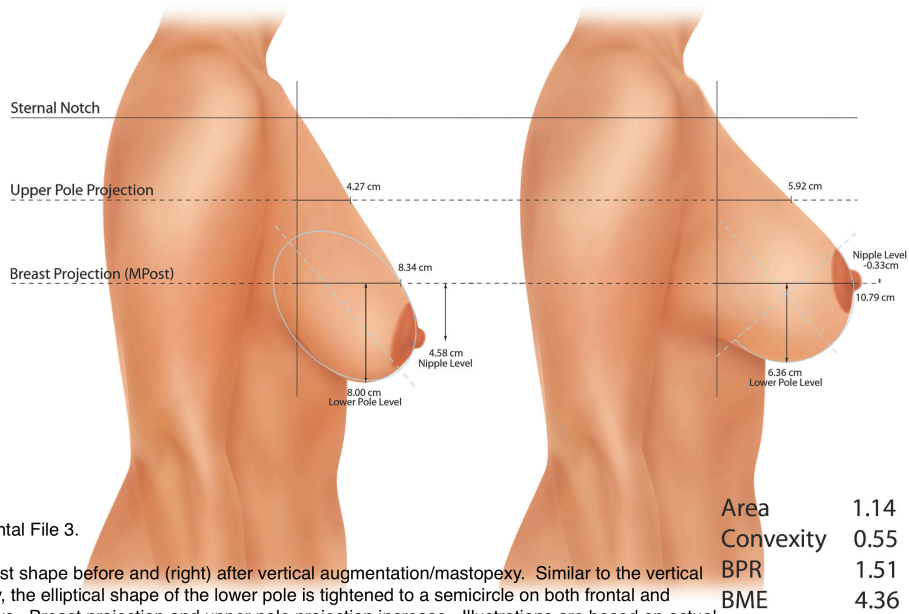

Supplemental File 3.

(Left) Breast shape before and (right) after vertical augmentation/mastopexy. Similar to the vertical mastopexy, the elliptical shape of the lower pole is tightened to a semicircle on both frontal and lateral views. Breast projection and upper pole projection increase. Illustrations are based on actual mean breast measurements. MPost, maximum postoperative breast projection; LPR, lower pole ratio; BPR, breast parenchymal ratio; BME, breast mound elevation.

# Augmentation/Mastopexy - Inverted-T

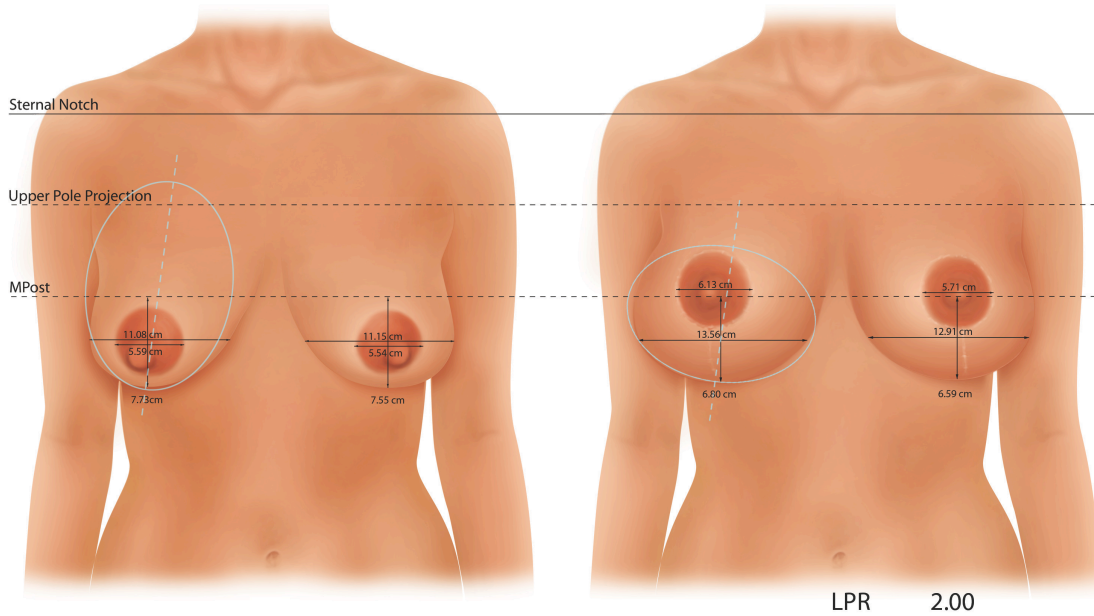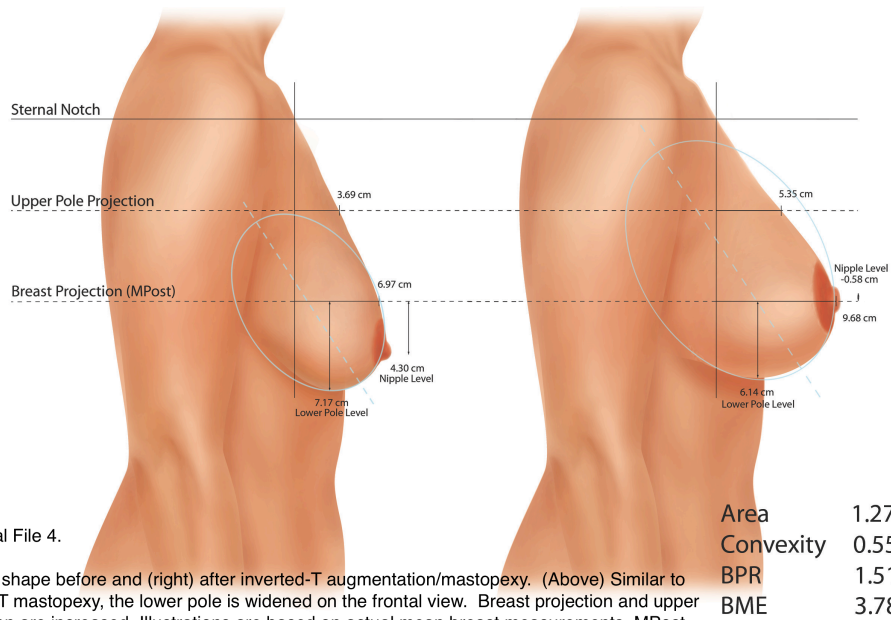

Supplemental File 4.

(Left) Breast shape before and (right) after inverted-T augmentation/mastopexy. (Above) Similar to the inverted-T mastopexy, the lower pole is widened on the frontal view. Breast projection and upper pole projection are increased. Illustrations are based on actual mean breast measurements. MPost, maximum postoperative breast projection; LPR, lower pole ratio; BPR, breast parenchymal ratio; BME, breast mound elevation.
